# Supplementary material for: Exploring the Variability in Reaction Times of Preschoolers at Risk of Attention-Deficit/Hyperactivity Disorder: an ex-Gaussian Analysis
Source: Springer Nature journal article supplement (doi:10.1007/s10802-018-00508-z), 2019-02-01
Supplement: MOESM1 [file 16436142]

Supplementary Table 1. Participant characteristics for the matched design

|  | Risk of ADHD  (*n*=65) | | TD  (*n*=65) | *F* value or *X2* |
| --- | --- | --- | --- | --- |
|  | Mean (*SD)* or *N*% | | Mean *(SD)* or *N*% |
| Age | 4.71(0.52) | | 4.75(0.69) | .19 |
| Gender（Male %） | 75.4% | | 73.8% | .04 |
| Estimated FSIQ | 104.42(15.20) | | 105.71(14.72) | .24 |
| SNAP-IV Parent report | |  | |  |
| Inattentive | 1.60(0.61) | | 0.52(0.35) | 102.43** |
| Hyperactive/impulsive | 1.89(0.62) | | 0.58(0.35) | 132.60** |
| SNAP-IV Teacher report |  | |  |  |
| Inattentive | 1.77(0.69) | | 0.34(0.36) | 108.96** |
| Hyperactive/impulsive | 1.79(0.76) | | 0.25(0.36) | 138.39** |

ADHD, Attention-deficit/Hyperactivity Disorder; TD, typically developing preschoolers; SNAP-IV, The Swanson, Nolan, and Pelham, Version IV Scale; *SD, standard deviation;* **p* < .01, ***p* < .001

Supplementary Table 2. K-CPT results for preschoolers at risk of ADHD and a matched TD group, as a function of ISI.

| ` | Risk of ADHD (*n*=65) | | TD (*n*=65) | | *F* value | | |
| --- | --- | --- | --- | --- | --- | --- | --- |
|  | ISI=1.5  Mean(SD) | ISI=3  Mean(SD) | ISI=1.5  Mean(SD) | ISI=3  Mean(SD) | Group | ISI | Group*ISI |
| Commission Errors | 12.53(4.88) | 13.63(5.27) | 9.48(6.08) | 11.46(6.61) | 7.73* | 27.56** | 2.15 |
| Omission Errors | 10.27(7.80) | 8.24(7.48) | 7.23(6.64) | 4.92(4.93) | 8.18* | 22.22** | 0.10 |
| Mean RT | 652.44(86.50) | 818.32(169.37) | 626.34(111.45) | 725.55(162.98) | 5.82 | 166.42** | 10.22* |
| RTSD | 243.71(58.83) | 388.98(181.37) | 199.87(62.30) | 244.77(59.53) | 14.30** | 115.83** | 6.03* |
| *Mu* | 499.17(131.48) | 470.88(126.54) | 488.05(128.46) | 494.96(127.12) | 0.35 | 0.28 | 3.34 |
| *Sigma* | 164.10(84.42) | 136.78(74.75) | 112.76(50.14) | 112.76(50.14) | 7.27* | 15.16** | 1.14 |
| *Tau* | 153.27(74.13) | 347.44(191.36) | 138.29(70.21) | 230.59(129.99) | 15.63** | 82.69** | 9.55** |

K-CPT, Conners Kiddie Continuous Performance Test; ADHD, Attention-deficit/Hyperactivity Disorder; TD, typically developing preschoolers; ISI, interstimulus interval; *SD,* standard deviation; RT, reaction time; RTSD, standard deviation of RT; **p* < .01 ***p* < .001
